# Supplementary material for: A qualitative content analysis of "problem students": how can we identify and manage them?
Source: Research Square preprint supplement (doi:10.21203/rs.3.rs-48925/v2), 2020-11-09
Supplement: Supplementary file 1 [file b02320288261557c7616e866.docx]

**Interview guide**

**Additional files**

**Semi-structured interview**

**3 main key topics**

Clarify the aim of the interview (study) and read/tell problem students the main area you will ask questions about. Remind interviewee that s/he can stop the tape recorder any time. Tell interviewee the approximate length of time the interview might take.

1. **Specific experiences of dealing with problem students**

1. Did you have any experience of dealing with problem students? (May you define an objective example of dealing with problem students?

Did you have another experience?

1. **how identify problem students**

Main questions:

1- What are the obstacles for problem students? Can you talk more about this?

2. What factors cause problem students? (Teacher, individual, system causes)

3. In the current education system, what criteria (formal and informal) are used for comprehensive identification? By what criteria are they identified? What services do they receive? What happens to them in the end?

4. What strategies are needed to be able to identify problem students?

**3) How manage problem students**

1. Who are involved in problem student's management (teacher, classmates, family)?

2. What strategies are needed to be able to Support problem students?
